# Supplementary material for: ZnAs@SiO2 nanoparticles as a potential anti-tumor drug for targeting stemness and epithelial-mesenchymal transition in hepatocellular carcinoma via SHP-1/JAK2/STAT3 signaling
Source: PubMed Central journal article supplement — Theranostics. 2019 Jun 9;9(15):4391–408. doi: 10.7150/thno.32462 (PMC6599649; doi:10.7150/thno.32462), 2019-06-09
Supplement: thnov09p4391s1.pdf [file thnov09p4391s1.pdf]

1  
2  
3  
4  
5  
6  
7  
8  
9  
10  
11  
12  
13  
14  
15  
16  
17  
18  
19  
20  
21  
22  
23  
24  
25  
26  
27

**ZnAs@SiO<sub>2</sub> nanoparticles as a potential anti-tumor drug for targeting stemness and epithelial-mesenchymal transition in hepatocellular carcinoma via SHP-1/JAK2/STAT3 signaling**

**Supplemental Material**

Yongquan Huang<sup>1,2,3#</sup>, Bin Zhou<sup>2,3#</sup>, Hui Luo<sup>3#</sup>, Junjie Mao<sup>2,3</sup>, Yin Huang<sup>2</sup>, Ke Zhang<sup>2,3</sup>,  
Chaoming Mei<sup>3</sup>, Yan Yan<sup>3</sup>, Hongjun Jin<sup>3</sup>, Jinhao Gao<sup>4</sup>, Zhongzhen Su<sup>1,3</sup>, Pengfei  
Pang<sup>2,3</sup>✉, Dan Li<sup>3</sup>✉, Hong Shan<sup>2,3</sup>✉

1. Department of Ultrasound, The Fifth Affiliated Hospital, Sun Yat-sen University, Zhuhai, Guangdong Province 519000, China
2. Center for Interventional Medicine, The Fifth Affiliated Hospital, Sun Yat-sen University, Zhuhai, Guangdong Province 519000, China
3. Guangdong Provincial Key Laboratory of Biomedical Imaging and Guangdong Provincial Engineering Research Center of Molecular Imaging, The Fifth Affiliated Hospital, Sun Yat-sen University, Zhuhai, Guangdong Province 519000, China
4. State Key Laboratory of Physical Chemistry of Solid Surfaces, The MOE Key Laboratory of Spectrochemical Analysis & Instrumentation, The Key Laboratory for Chemical Biology of Fujian Province, and Department of Chemical Biology, College of Chemistry and Chemical Engineering, Xiamen University, Xiamen, Fujian Province 361005, China

# These authors contributed equally to this article.

✉ Corresponding authors: shanhong@mail.sysu.edu.cn, lidan25@mail.sysu.edu.cn, pangpf@mail.sysu.edu.cn

1 **Methods**

2 **Primary cells**

3 Following informed consent, fresh tissue samples were obtained from patients undergoing surgery  
4 at the Department of Hepatological Surgery, The Fifth Affiliated Hospital, Sun-Yat Sen  
5 University. Primary liver cancer cells were derived from tissues of patients who had not yet  
6 undergone chemotherapy and were undergoing liver cancer resection. The isolation and culture of  
7 primary cells were performed as described previously [1]. Tumor-derived cells were used at  
8 passage 1.

9

10 **Results**

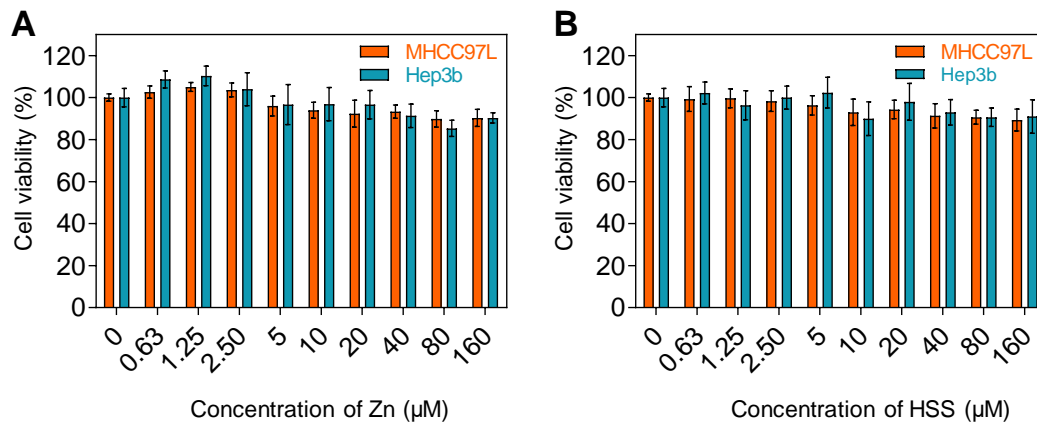

11

12 **Figure S1.** Viability of MHCC97L and Hep3b cells after treatment with various concentrations of  
13 ZnCl<sub>2</sub> (A) or HSS (B) for 24 h.

14

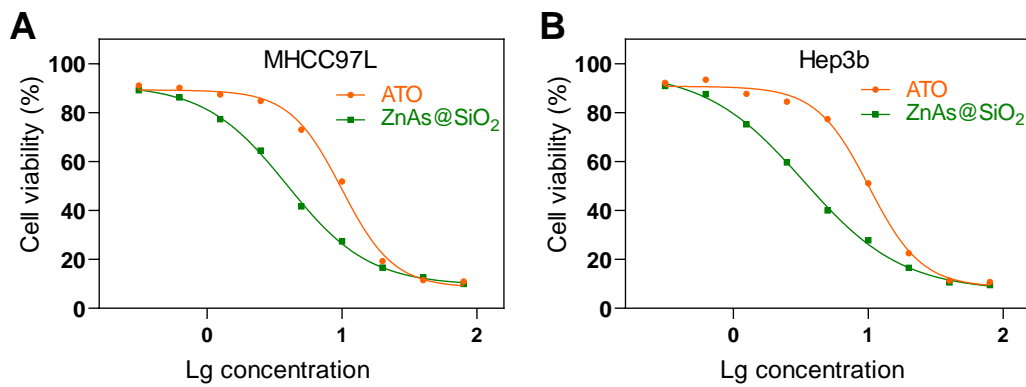

15

16 **Figure S2.** IC<sub>50</sub> curves of ATO and ZnAs@SiO<sub>2</sub> in MHCC97L (A) and Hep3b (B) cells.

17

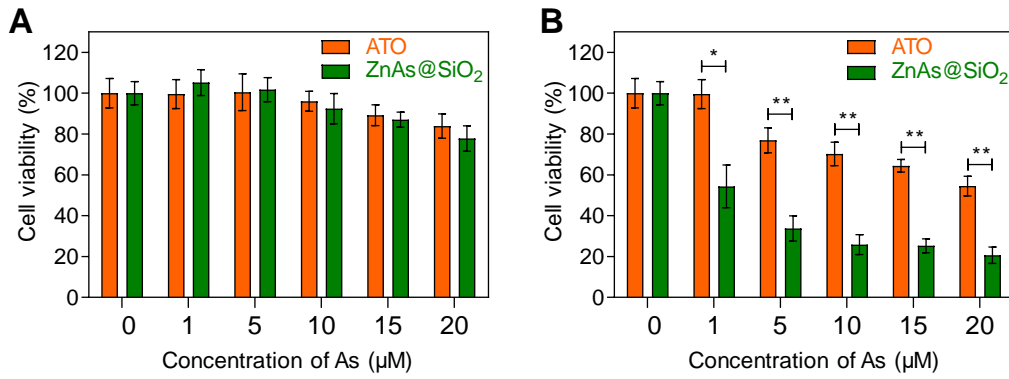

1  
2 **Figure S3.** Viability of primary hepatocytes and HCC cells after treatment with various  
3 concentrations of ATO or ZnAs@SiO<sub>2</sub> NPs for 24 h. \*,  $P < 0.05$ ; \*\*,  $P < 0.01$ .  
4

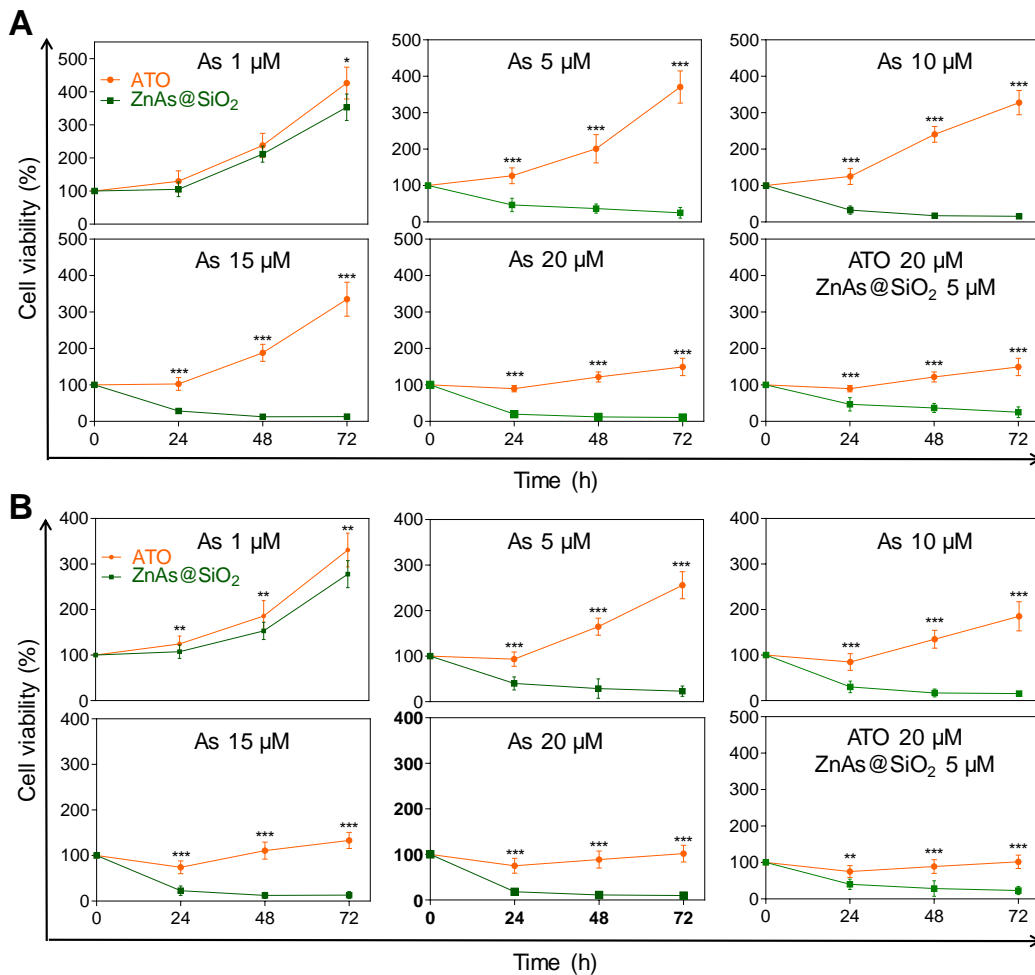

5  
6 **Figure S4.** Viability of MHCC97L (A) and Hep3b (B) cells after treatment with various  
7 concentrations of ATO or ZnAs@SiO<sub>2</sub> NPs for 24 h, 48 h, and 72 h. \*,  $P < 0.05$ ; \*\*,  $P < 0.01$ ;  
8 \*\*\*,  $P < 0.001$ .

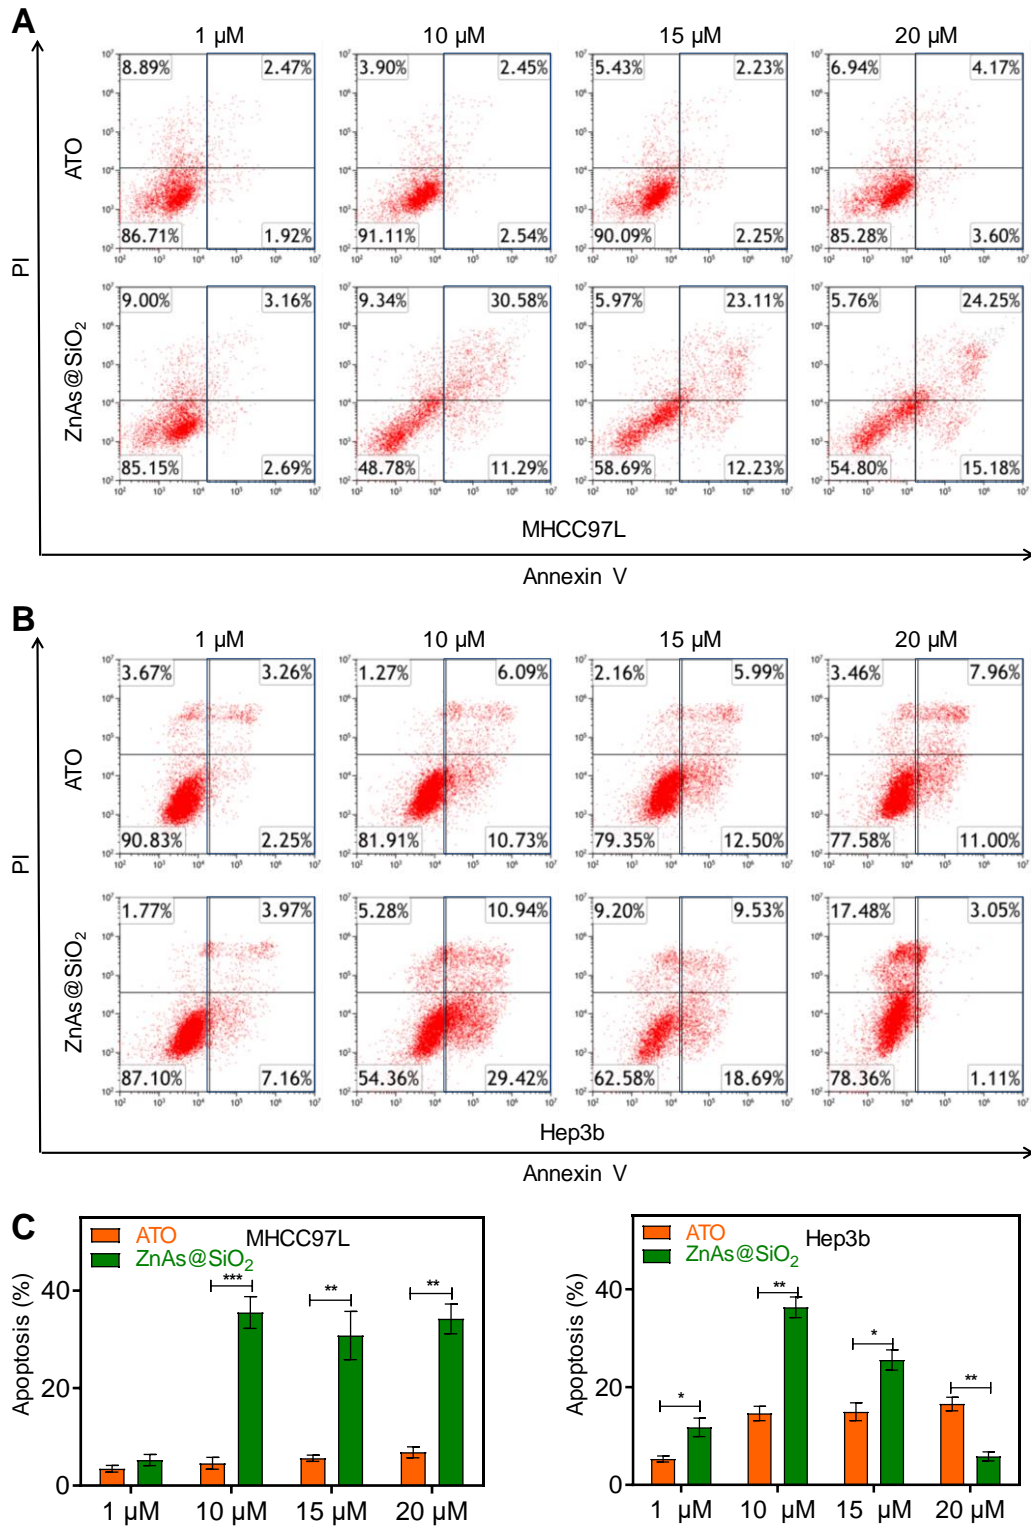

1  
2 **Figure S5.** Analysis of apoptosis of MHCC97L (A) and Hep3b (B) cells and quantification (C)  
3 after treatment with ATO or ZnAs@SiO<sub>2</sub> NPs at indicated concentrations for 24 h. \*,  $P < 0.05$ ;  
4 \*\*,  $P < 0.01$ ; \*\*\*,  $P < 0.001$ .

5

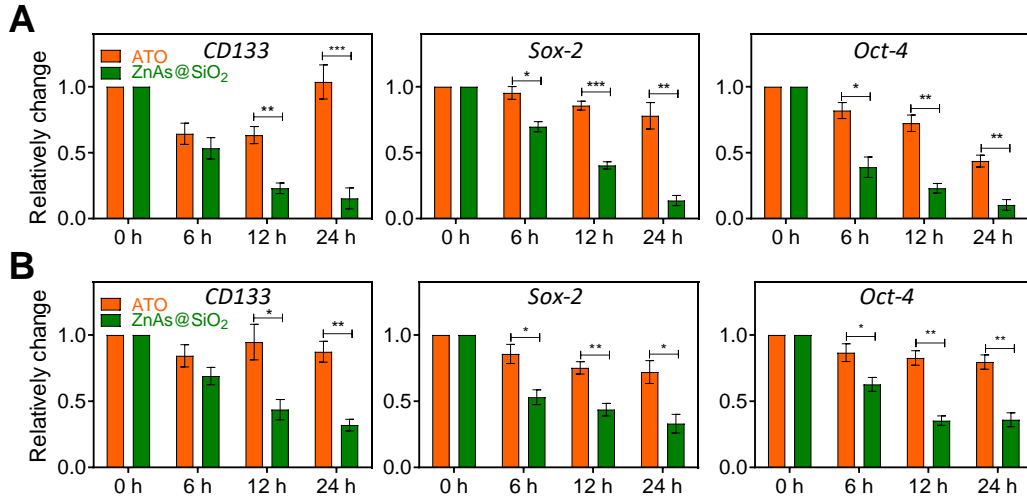

1  
2 **Figure S6.** Changes of stemness markers, CD133, Sox-2, and Oct-4 at the mRNA level of  
3 MHCC97L (A) and Hep3b (B) cells after treatment with ATO or ZnAs@SiO<sub>2</sub> NPs at indicated  
4 time points. \*,  $P < 0.05$ ; \*\*,  $P < 0.01$ ; \*\*\*,  $P < 0.001$ .

5

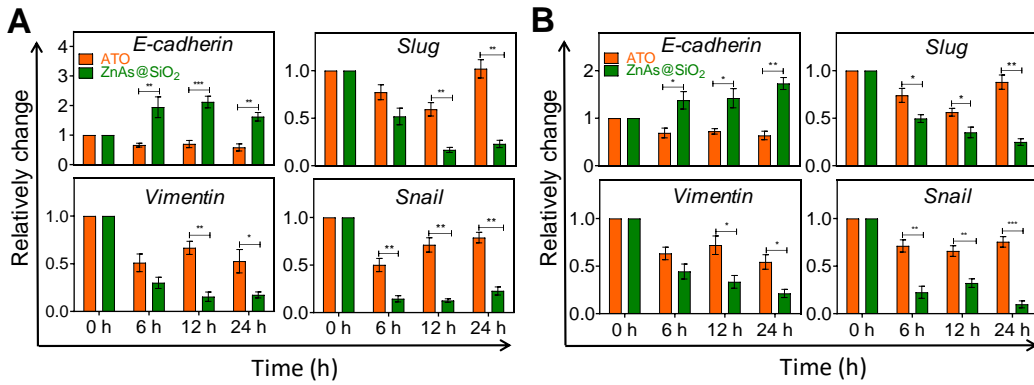

6  
7 **Figure S7.** Changes of EMT markers, E-Cadherin, Snail, Slug, and Vimentin at the mRNA level  
8 in MHCC97L (A) and Hep3b (B) cells after treatment with ATO or ZnAs@SiO<sub>2</sub> NPs at indicated  
9 time points. \*,  $P < 0.05$ ; \*\*,  $P < 0.01$ ; \*\*\*,  $P < 0.001$ .

10

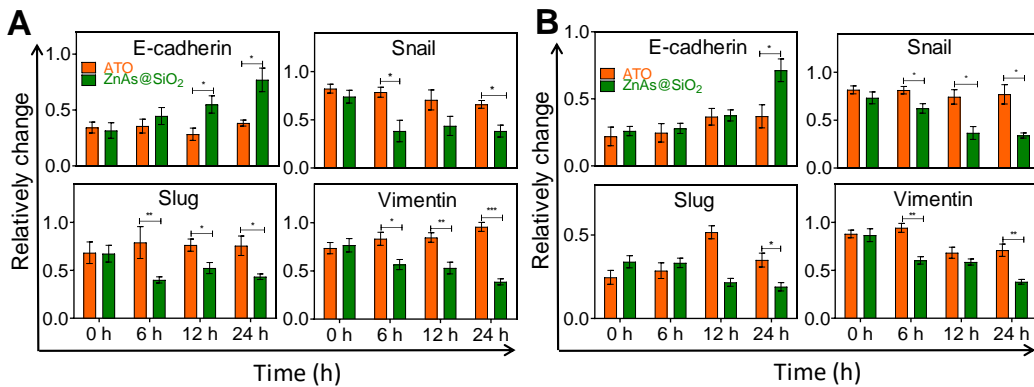

11  
12 **Figure S8.** Quantification of protein levels of EMT markers, E-Cadherin, Snail, Slug, and

1 Vimentin in MHCC97L (A) and Hep3b (B) cells in Figure 5G, H. \*,  $P < 0.05$ ; \*\*,  $P < 0.01$ ;  
 2 \*\*\*,  $P < 0.001$ .

3

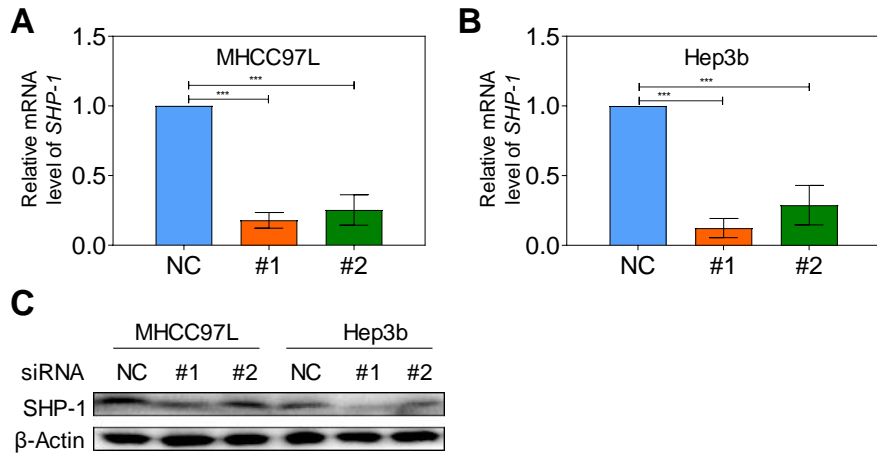

4 **Figure S9.** mRNA level of SHP-1 (A, B) and protein level of SHP-1 (C) after knockdown of  
 5 SHP-1 by siRNA NC, siRNA #1, or siRNA #2. \*\*\*,  $P < 0.001$ .

7

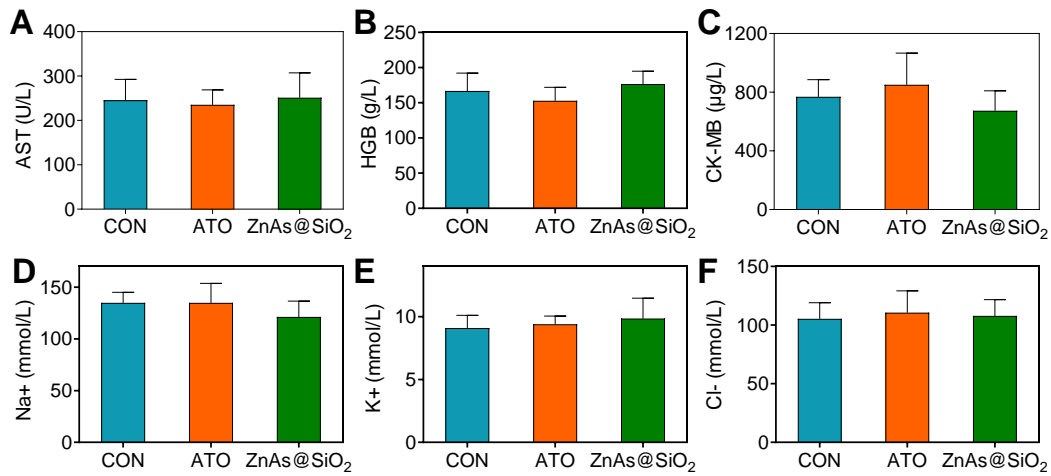

8 **Figure S10.** Analysis of blood ALT (A), AST (B), Cr (C), HGB (D), and concentration of Na<sup>+</sup> (E),  
 9 K<sup>+</sup> (F) after injections of PBS, ATO, or ZnAs@SiO<sub>2</sub> NPs for 21 days.

11

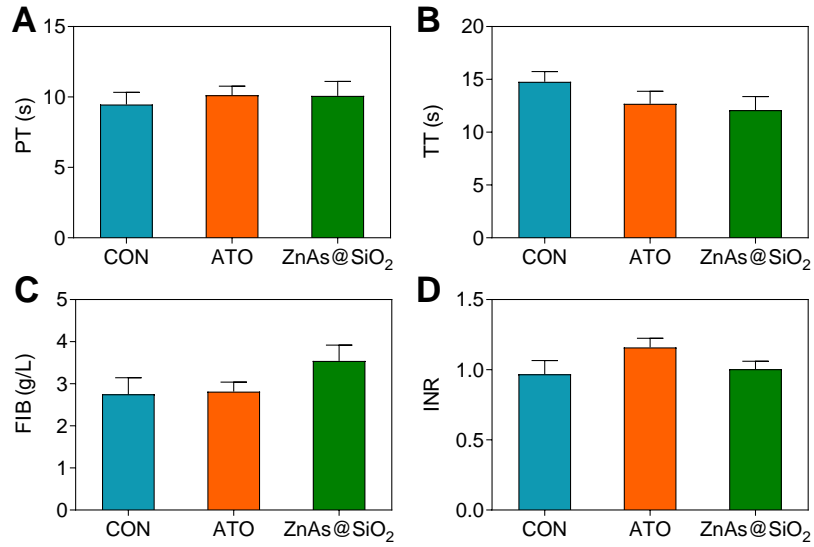

1  
2 **Figure S11.** Analysis of blood PT (A), TT (B), FIB (C), and INR (D) after injections of PBS,  
3 ATO, or ZnAs@SiO<sub>2</sub> NPs for 21 days.  
4

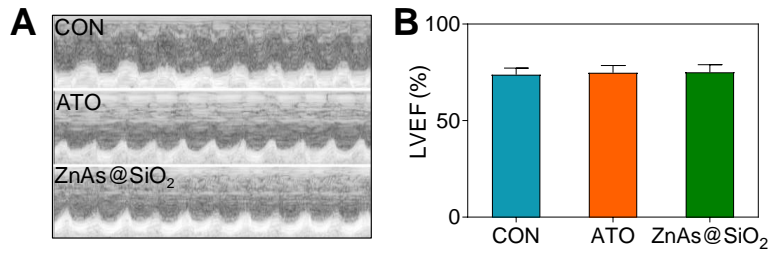

5  
6 **Figure S12.** Echocardiography evaluation (A) and quantification of LVEF (B) after injections of  
7 PBS, ATO, or ZnAs@SiO<sub>2</sub> NPs for 21 days.  
8

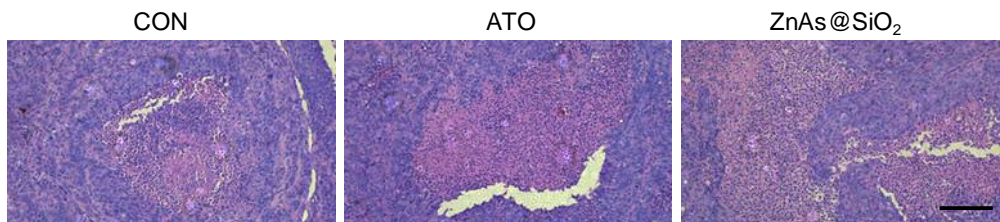

9  
10 **Figure S13.** Histology images of the xenograft model after injections of PBS, ATO, or  
11 ZnAs@SiO<sub>2</sub> NPs for 21 days. Scale bar, 200 μm.  
12

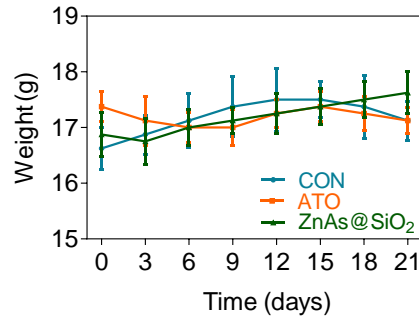

1  
2  
3  
4

**Figure S14.** Tumor weight change curves of mice after treatment by PBS, ATO, or ZnAsO@SiO<sub>2</sub>.

**Table S1.** Primer sequences for RT-qPCR assay

| Gene                     |         | Sequence                | Length (bp) |
|--------------------------|---------|-------------------------|-------------|
| <i>Ki67</i>              | Forward | ACGCCTGGTTACTATCAAAGG   | 22          |
|                          | Reverse | CAGACCCATTTACTTGTGTTGGA | 23          |
| <i>PCNA</i>              | Forward | CCTGCTGGGATATTAGCTCCA   | 21          |
|                          | Reverse | CAGCGGTAGGTGTCGAAGC     | 19          |
| <i>PROM 1 (CD133)</i>    | Forward | AGTCGGAAACTGGCAGATAGC   | 21          |
|                          | Reverse | GGTAGTGTGTACTGGGCCAAT   | 22          |
| <i>Sox-2</i>             | Forward | GCCGAGTGGAACTTTTGTCG    | 21          |
|                          | Reverse | GGCAGCGTGTACTTATCCTTCT  | 22          |
| <i>Oct-4</i>             | Forward | CTGGGTTGATCCTCGGACCT    | 20          |
|                          | Reverse | CCATCGGAGTTGCTCTCCA     | 19          |
| <i>CDH1 (E-Cadherin)</i> | Forward | CGAGAGCTACACGTTACGG     | 20          |
|                          | Reverse | GGGTGTCGAGGGAAAAATAGG   | 21          |
| <i>Slug</i>              | Forward | CGAACTGGACACACATACAGTG  | 22          |
|                          | Reverse | CTGAGGATCTCTGGTTGTGGT   | 21          |
| <i>Snail</i>             | Forward | TCGGAAGCCTAACTACAGCGA   | 21          |
|                          | Reverse | AGATGAGCATTGGCAGCGAG    | 20          |
| <i>Vimentin</i>          | Forward | GACGCCATCAACACCGAGTT    | 20          |



|                      |         |                       |    |
|----------------------|---------|-----------------------|----|
|                      | Reverse | CTTTGTCGTTGGTTAGCTGGT | 21 |
| <i>β-Actin</i>       | Forward | CATGTACGTTGCTATCCAGGC | 21 |
|                      | Reverse | CTCCTTAATGTCACGCACGAT | 21 |
| <i>PTPN6 (SHP-1)</i> | Forward | GGAGAAGTTTGCGACTCTGAC | 21 |
|                      | Reverse | GCGGGTACTTGAGGTGGATG  | 20 |

1

2

**Table S2. Sequences for Si-SHP-1**

| Sequence number | Sequence            |
|-----------------|---------------------|
| si-SHP-1 #1     | GCAAGAACCGCTACAAGAA |
| si-SHP-1 #2     | GCACCATCATCCACCTCAA |

3

4

**Reference:**

5

1. Francavilla C, Lupia M, Tsafou K, Villa A, Kowalczyk K, Rakownikow Jersie-Christensen R, et al. Phosphoproteomics of Primary Cells Reveals Druggable Kinase Signatures in Ovarian Cancer. *Cell Rep.* 2017; 18: 3242-56.

6

7

8
